# Supplementary material for: Identification and Molecular Characterization of RWP-RK Transcription Factors in Soybean
Source: MDPI journal article supplement (doi:10.3390/genes14020369), 2023-01-31
Supplement: s1 [file s1]

Supplementary table S1. The physico-chemical properties of *GmRWP-RK* family members in *Glycine max* L.

| Gene name         | Locus ID        | CDS  | Chr. | Start    | End      | AA   | MW    | PI   | SL |
|-------------------|-----------------|------|------|----------|----------|------|-------|------|----|
| <i>GmRWP-RK1</i>  | Glyma.01G159200 | 981  | Gm01 | 49710855 | 49716475 | 326  | 37.49 | 6.53 | N  |
| <i>GmRWP-RK2</i>  | Glyma.02G311000 | 2133 | Gm01 | 49710855 | 49716475 | 710  | 79.08 | 5.87 | N  |
| <i>GmRWP-RK3</i>  | Glyma.04G000600 | 2358 | Gm04 | 72328    | 75769    | 785  | 86.86 | 5.51 | N  |
| <i>GmRWP-RK4</i>  | Glyma.04G017400 | 2727 | Gm04 | 1352714  | 1357474  | 908  | 10.08 | 5.71 | N  |
| <i>GmRWP-RK5</i>  | Glyma.04G054800 | 1176 | Gm04 | 4431659  | 4434088  | 391  | 44.61 | 5.46 | N  |
| <i>GmRWP-RK6</i>  | Glyma.04G169000 | 825  | Gm04 | 42346861 | 42348336 | 274  | 32.08 | 5.52 | N  |
| <i>GmRWP-RK7</i>  | Glyma.04G234600 | 750  | Gm04 | 42346861 | 42348336 | 249  | 28.55 | 8.66 | N  |
| <i>GmRWP-RK8</i>  | Glyma.05G026500 | 900  | Gm05 | 2291691  | 2292932  | 299  | 34.92 | 5.01 | N  |
| <i>GmRWP-RK9</i>  | Glyma.06G000400 | 1746 | Gm06 | 46421    | 49689    | 581  | 64.47 | 6.40 | N  |
| <i>GmRWP-RK10</i> | Glyma.06G017800 | 2733 | Gm06 | 1338317  | 1343018  | 910  | 10.14 | 5.60 | N  |
| <i>GmRWP-RK11</i> | Glyma.06G054900 | 315  | Gm06 | 4148863  | 4151186  | 104  | 11.91 | 9.51 | M  |
| <i>GmRWP-RK12</i> | Glyma.06G129900 | 765  | Gm06 | 10677896 | 10679300 | 254  | 29.10 | 6.20 | N  |
| <i>GmRWP-RK13</i> | Glyma.06G130000 | 936  | Gm06 | 10685232 | 10687098 | 311  | 35.55 | 7.14 | N  |
| <i>GmRWP-RK14</i> | Glyma.06G194300 | 807  | Gm06 | 17317234 | 17318568 | 268  | 31.46 | 5.74 | N  |
| <i>GmRWP-RK15</i> | Glyma.06G198300 | 1239 | Gm06 | 18038491 | 18040823 | 412  | 46.29 | 4.79 | N  |
| <i>GmRWP-RK16</i> | Glyma.09G137000 | 2973 | Gm09 | 33895571 | 33900191 | 990  | 10.95 | 5.94 | N  |
| <i>GmRWP-RK17</i> | Glyma.10G234100 | 2976 | Gm10 | 46304593 | 46310226 | 991  | 10.97 | 5.53 | N  |
| <i>GmRWP-RK18</i> | Glyma.11G085500 | 996  | Gm11 | 6431566  | 6436559  | 331  | 38.38 | 8.74 | N  |
| <i>GmRWP-RK19</i> | Glyma.11G125500 | 3015 | Gm11 | 9530122  | 9536109  | 1004 | 11.12 | 5.80 | N  |
| <i>GmRWP-RK20</i> | Glyma.12G050100 | 2916 | Gm11 | 9530122  | 9536109  | 971  | 10.76 | 6.00 | N  |
| <i>GmRWP-RK21</i> | Glyma.13G346300 | 2946 | Gm13 | 43682553 | 43689937 | 981  | 10.78 | 5.81 | N  |
| <i>GmRWP-RK22</i> | Glyma.14G001600 | 1752 | Gm14 | 202374   | 204618   | 583  | 64.87 | 6.27 | N  |
| <i>GmRWP-RK23</i> | Glyma.15G027900 | 2922 | Gm15 | 2228855  | 2237078  | 973  | 10.73 | 5.85 | N  |
| <i>GmRWP-RK24</i> | Glyma.16G182400 | 2964 | Gm16 | 34323618 | 34328331 | 987  | 10.93 | 6.09 | N  |
| <i>GmRWP-RK25</i> | Glyma.17G100400 | 834  | Gm17 | 7911866  | 7913909  | 277  | 32.11 | 5.22 | N  |
| <i>GmRWP-RK26</i> | Glyma.20G016400 | 1239 | Gm20 | 1484559  | 1486779  | 412  | 46.40 | 4.76 | N  |
| <i>GmRWP-RK27</i> | Glyma.20G016500 | 984  | Gm20 | 1491662  | 1493855  | 327  | 36.95 | 5.69 | N  |
| <i>GmRWP-RK28</i> | Glyma.20G160200 | 2976 | Gm20 | 39860747 | 39866224 | 991  | 10.96 | 5.64 | N  |

Coding Sequence: CDS, Amino Acid: AA, Molecular Weight: MW, Isoelectric Point: PI, Subcellular Location: SL, N: Nuclear, M: Mitochondrial

Supplementary table S2: List of Total 28 *GmRWK-RK* genes primers that are used in the in this experiment.

| #  | Gene       | Primers | Primer Sequence (5' - 3') |
|----|------------|---------|---------------------------|
| 1  | G1RWP-RK1  | F       | ACAGGGGAAGAAAGGCAAGG      |
|    |            | R       | CCAGTGACTCAGACTCGTCG      |
| 2  | G1RWP-RK2  | F       | GCGCTTCAACCTAAGCGATG      |
|    |            | R       | CGCAGGCTAAAACAACCCAC      |
| 3  | G1RWP-RK3  | F       | TGTGTCTCGGTGTTGTCGAG      |
|    |            | R       | ACGGCTGCAGGTGGAATAAA      |
| 4  | G1RWP-RK4  | F       | CAGCTAACGGTGCTGGTAAC      |
|    |            | R       | TTAAGCTCTGCCTCGCTACTG     |
| 5  | G1RWP-RK5  | F       | GTCCTCGTAATTGGCCTCCT      |
|    |            | R       | TGGCTGATCAATCCGATCCTT     |
| 6  | G1RWP-RK6  | F       | CAGAGGTGGCCACATAGGAAG     |
|    |            | R       | ATCTCAATGGCAGCCCTAGT      |
| 7  | G1RWP-RK7  | F       | GGGCTTTGTCTTTGTCTCCG      |
|    |            | R       | TGGTGAAATCTCCATTATTTGTGA  |
| 8  | G1RWP-RK8  | F       | AAGCGTGTTCGTTCAAGGCCAAC   |
|    |            | R       | TCTCCCGTTGCGTTAACAAT      |
| 9  | G1RWP-RK9  | F       | CAAGGGAAAATCCGGGTCCA      |
|    |            | R       | ACGTGCAGATCTACGTTCCG      |
| 10 | G1RWP-RK10 | F       | TGACAAAGATCCTGCCACGG      |
|    |            | R       | TTCGGGTGTTACCAAGTGT       |
| 11 | G1RWP-RK11 | F       | ATGACTCAGTTGTGTGGTGGA     |
|    |            | R       | AACACTATTCTCTTCAACTTCAGG  |
| 12 | G1RWP-RK12 | F       | GCAGTACGAAGAAGAGGCCA      |
|    |            | R       | GTTGAGCTCCCTGCACCTTT      |
| 13 | G1RWP-RK13 | F       | GTCTCTGACCGCGATTTTCC      |
|    |            | R       | GCGGTGTCCACCAATCAAGT      |
| 14 | G1RWP-RK14 | F       | GGCTGCCATTGAGATGTTGA      |
|    |            | R       | ACCTCATGCCCACGAGTTTC      |
| 15 | G1RWP-RK15 | F       | GGGCGGGTAAGGAACTGAT       |
|    |            | R       | TCTTGTGGGGATCCACGTTA      |
| 16 | G1RWP-RK16 | F       | GAAGCAAGGGCACAAGTCC       |
|    |            | R       | GCATGAACCATGAGGAGTAGGA    |
| 17 | G1RWP-RK17 | F       | AAGCAAACAGACAGGCTGGA      |
|    |            | R       | CCCAACCTCTCGAGTGTAAC      |

|    |             |   |                                         |
|----|-------------|---|-----------------------------------------|
| 18 | G1RWP-RK18  | F | CACAGCAACAATTTCCAACCATC                 |
|    |             | R | TGTCCGGTGACTCAGACTCATA                  |
| 19 | G1RWP-RK19  | F | GCCATAAAGCTTGCCATTGGA                   |
|    |             | R | TGTTCATCAGCTCCTTCTACCC                  |
| 20 | G1RWP-RK20  | F | GCTGGCTGGAGTAATAGCCC                    |
|    |             | R | CACTAAATTCAATCCATCAGGTGGT               |
| 21 | G1RWP-RK21  | F | AGTCTGAAGGATGCCGCAAA                    |
|    |             | R | CAGAGTCAAGCACCGTCTGT                    |
| 22 | G1RWP-RK22  | F | TCTTCTGGACGTTTCCTTGGC                   |
|    |             | R | AGTCAAAGATGGAGGCGTGG                    |
| 23 | G1RWP-RK23  | F | CCTTCTATGGGGGCGTTTGT                    |
|    |             | R | CTTCACTACAAGGTGCGGGT                    |
| 24 | G1RWP-RK24  | F | GCAAGGACACGAAGTCCTGA                    |
|    |             | R | GGATTTCCACTGCCACTTGAG                   |
| 25 | G1RWP-RK25  | F | GGCTGGAACGAAGTTGATGC                    |
|    |             | R | TTGCTTCTCGATCCCACCAC                    |
| 26 | G1RWP-RK26  | F | CCACGCAATATGCCTCGTTG                    |
|    |             | R | ACCCTGCTTCAGTCCTCTCT                    |
| 27 | G1RWP-RK27  | F | TGGATTGGACTGAAAGGCAGA                   |
|    |             | R | CTACGTCCAGTTTGACCGCT                    |
| 28 | G1RWP-RK28  | F | CTCCAACCCCATGTCACCTT                    |
|    |             | R | TGTGGCAATCAGAGAAGGCA                    |
| 29 | Actin       | F | FCACCAGCCCAAGAAGATC                     |
|    |             | R | ATGGCGTTATCCACA                         |
| 30 | GFP-CsCLS21 | F | GGGGACTCTTGACCATGGATACAGATTGCAATACGGGGC |
|    |             | R | TTGCTCACCATCAGATCATTACAAGCCGCCGATGGATGG |

**Figure S1:** A putative protein structure representation of RWP-RK transcription factor. In the below figure spirals denotes helices, whereas broad strips represent  $\beta$ -pleated sheets and thin loops were represented by coils.

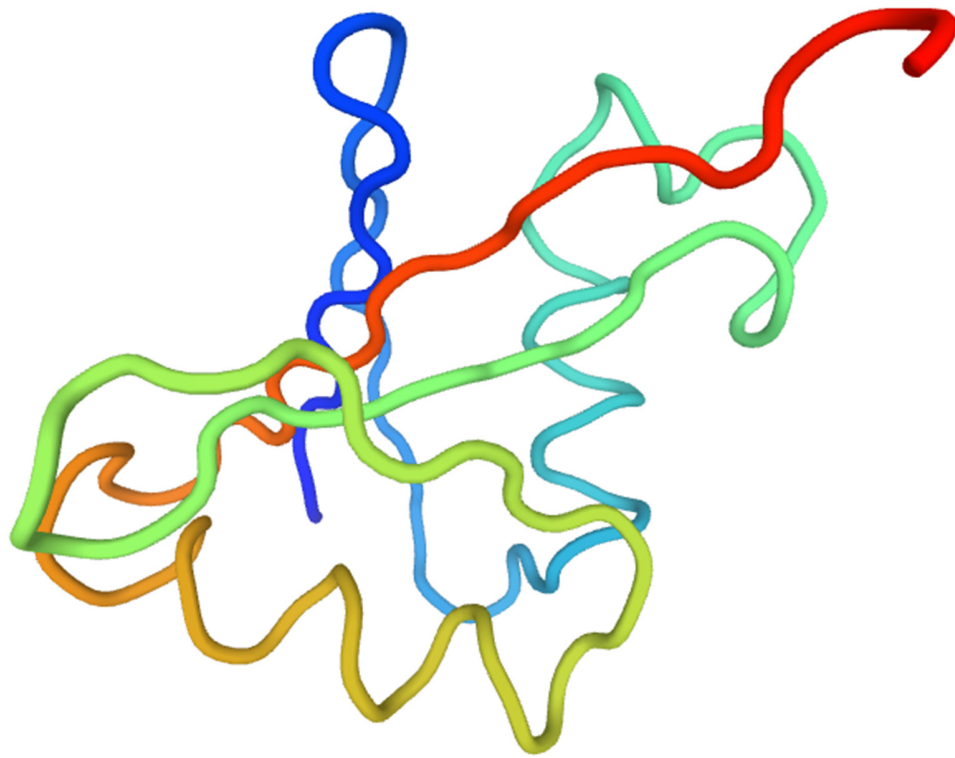

GmRWP-RK-2

Figure S2: Multiple protein sequence alignment of RWP-RK transcription factors using clustal omega software.

|            |                                                            |     |
|------------|------------------------------------------------------------|-----|
| GmRWP-RK1  | -----PVLLVTNPKLKM-----IPNL-----LDDL---HVIYKLDKKE-----      | 127 |
| GmRWP-RK18 | -----RLLLVTRNPKLKM-----IPNL-----LDDL---HMIYKLNKKE-----     | 132 |
| GmRWP-RK12 | -----DLESWNLDFILPP-----LDED-----LE-E-----LDQKQLKS          | 92  |
| GmRWP-RK7  | -----DLENLDLDFSLPP-----LGEY-----LEEE-----LDQKPLNI          | 87  |
| GmRWP-RK13 | -----DLENLDLDFSLPS-----LGEH-----LE-E-----VDQKPSNI          | 96  |
| GmRWP-RK6  | -----DGYHWPYEFPL-----QDSY-----LDAIPYMKCYYPHDILYES-TL       | 74  |
| GmRWP-RK14 | -----DGYHWPHEFPL-----QDSY-----LDAIPFMKFYYPHDILYET-TL       | 75  |
| GmRWP-RK8  | -----PSLDWPYDFPI-----QDYY-----IDAVPLMDYY-PSDPLYETLT-       | 64  |
| GmRWP-RK25 | -----PSLDWPYGFPI-----QDYY-----LDAVPLMDYY-PSDPLYETLTL       | 71  |
| GmRWP-RK15 | RQINVTNGVRFDKLEIHGTVGVINHAICHVEDKTSNRPPRDYQIIDFCNKN-----   | 218 |
| GmRWP-RK26 | RQINVTNGVRFDKLEIHGAVGVINHAICLVEDKTSNRPPRDYQIIDFCNKN-----   | 218 |
| GmRWP-RK27 | RQINVTNGVRFDKLEIHGAVGVINHAICLVEDKTSNRPPRDYQIIDFCNKN-----   | 177 |
| GmRWP-RK5  | RQTIHTNGTDFERLEIHGRIGLISHIIIQNSITPGGSCDNYQMIDFTNGS-----    | 204 |
| GmRWP-RK11 | -----                                                      | 0   |
| GmRWP-RK21 | DISEYPLVHHARKYNLNAAVA-----IRLRSTY-----TNDDYILEFFLPVN-----  | 492 |
| GmRWP-RK23 | DISEYPLVHHARKYNLNAAVA-----IRLRSTY-----TNDDYILEFFLPVN-----  | 492 |
| GmRWP-RK19 | DIGEYPLVHHARKYNLNAAVA-----IRLRSTY-----TNDDYILEFFLPVN-----  | 530 |
| GmRWP-RK20 | DIGEYPLVHHARKYNLNAAVA-----IRLRSTY-----TNGDDYILEFFLPVN----- | 491 |
| GmRWP-RK17 | CKTDYPLVHYALMFGLTSCFT-----ICLRSSH-----TGNDYVLEFFLPVR-----  | 456 |
| GmRWP-RK28 | YKTDYPLVHYALMFGLTSCFA-----ICLRSSH-----TGNDYVLEFFLPVR-----  | 454 |
| GmRWP-RK16 | CKTEYPLVHYALMFGLTSCFA-----VCLQSSH-----TGNDYVLEFFLPVG-----  | 446 |
| GmRWP-RK24 | CKTEYPLVHYALMFHLNSCFA-----VCLQSSH-----TGNDYVLEFFLPVG-----  | 445 |
| GmRWP-RK4  | SKKDYPPLSHYARLFGHAAVA-----IRLRSIY-----NSTDDFVLEFFLPVD----- | 463 |
| GmRWP-RK10 | SKKDYPMSHHARLFGHAAVA-----IRLRSIY-----NSTDDFVLEFFLPVD-----  | 465 |
| GmRWP-RK3  | SKAEYPLAHHANMFGLHAAVA-----IPLLSL-----SADFVLEFFLPKD-----    | 382 |
| GmRWP-RK9  | SKAEYPLAHHANMFGLHAALG-----IPLRSA-----SADFVLEFFLPKD-----    | 391 |
| GmRWP-RK2  | TKAEYPLSHHANIIDLHSAVA-----IPLRTSS-----YPHFDFVLEFFLPKH----- | 357 |
| GmRWP-RK22 | SNAEYPLSHHASIFDLHAAVA-----IPLTTFSS-----SSFHFVLEFFLPDL----- | 234 |
